# Supplementary material
Source: MDPI journal article supplement (https://www.mdpi.com/1424-2818/13/4/154)
Supplement: s1 [file s1]

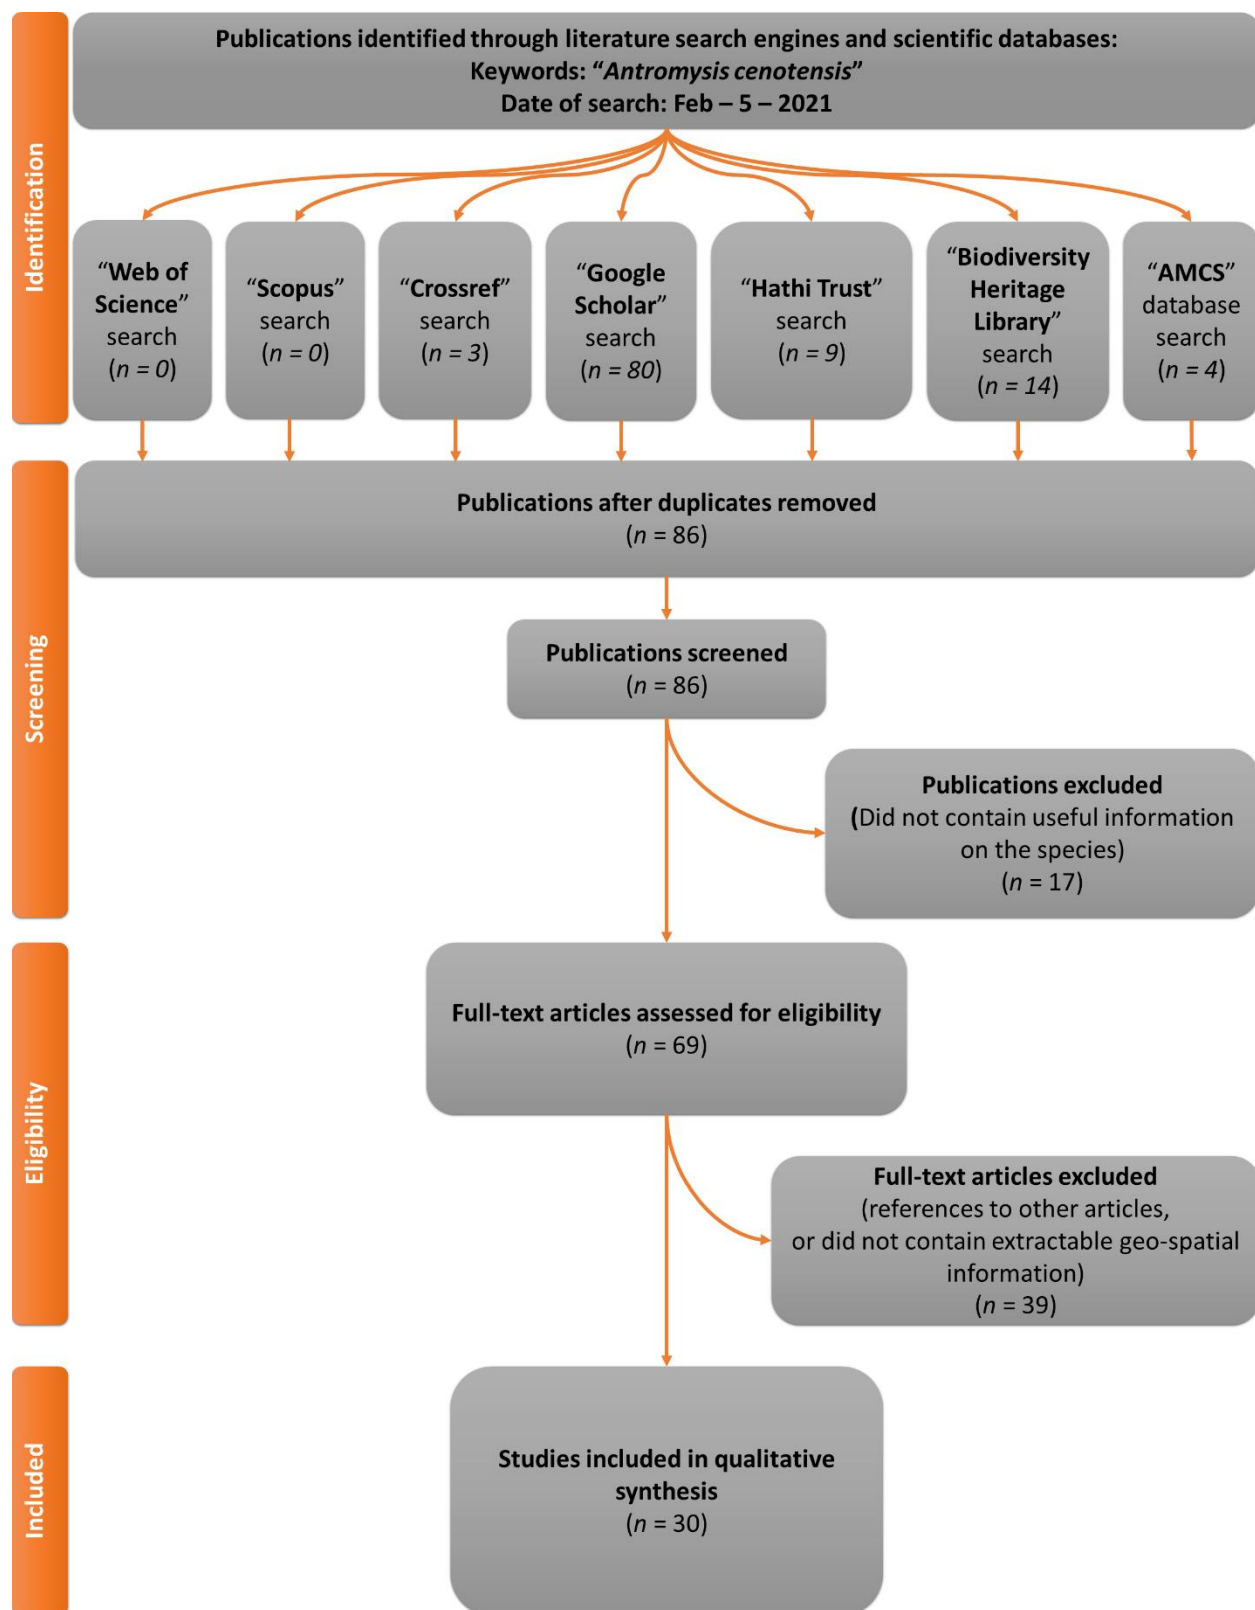

**Figure S1.** PRISMA flow diagram 1. Summary of literature search and selection process. The keywords used for the search were "*Antromysis cenotensis*". The search was done on February 5, 2021.

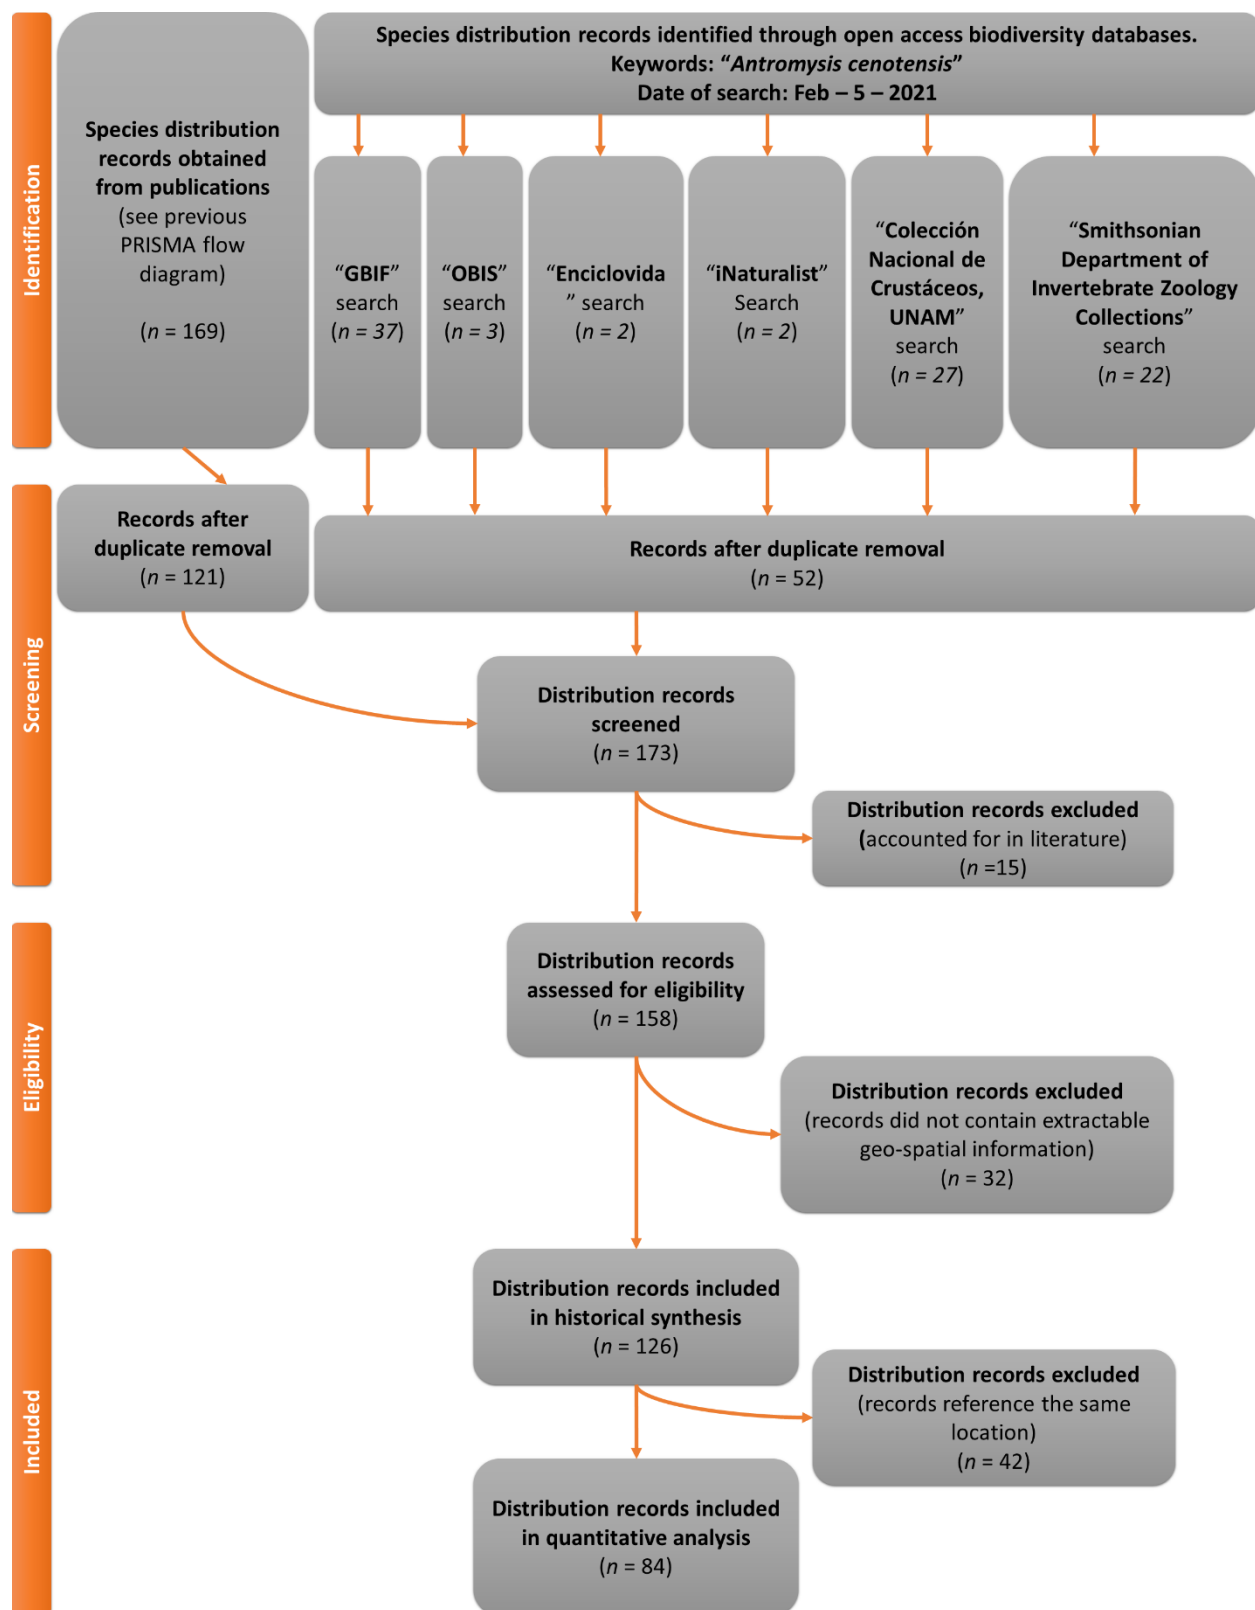

**Figure S2.** PRISMA flow diagram 2. Summary of distribution records/occurrences search, and selection process through obtained publications from PRISMA flow diagram 1 (**Figure S1**) and open access biodiversity databases. The keywords used were "*Antromysis cenotensis*". The search was done on February 5, 2021.
